# Supplementary material for: Effect of Deep Slow Breathing on Pain-Related Variables in Osteoarthritis
Source: Pain Res Manag. 2019 Jun 3;2019:5487050. doi: 10.1155/2019/5487050 (PMC6589254; doi:10.1155/2019/5487050)
Supplement: Supplementary Materials — Video demonstrations of the full and modified expiratory pauses that were provided to the study participants as reminders for them to review. [file 5487050.f1.zip]

Archive with 2 entries (2 files):
- 5487050.f1/Expiratory Pause.mp4
- 5487050.f1/Modified Expiratory Pause.mp4
